# Supplementary material for: Cross-analyzing addiction specialist and patient opinions and experiences about addictive disorder screening in primary care to identify interaction-related obstacles: a qualitative study
Source: Springer Nature journal article supplement (doi:10.1186/s13011-023-00522-5), 2023-02-17
Supplement: MOESM3 [file 24039874]

## **Interview guide – addiction specialist**

*My name is (name of intern). I am a general medicine intern at Tours. My thesis focuses on the realities of identifying problematic behaviors and substance use, and addictions. It is part of a larger project called PAPRICA (Problematic use and Addiction in Primary Care), the aim of which is to identify the problems encountered in identifying problematic addictions and to provide solutions.*

*This is a qualitative study using interviews with addiction specialists.*

*This interview is recorded and anonymous. It will then be transcribed in writing to be analyzed using the grounded theory method.*

### **Interview guide :**

No questions, but words, reflections, themes from the literature review

Always ANCHORING on the theme and expressing the CONVICTIONS

Naive speech, question as vaguely as possible

—> **And always add: why?**

### **Icebreaker question :**

- Tell me the story of the last patient you saw.
- How did he get to your practice?
- Is it always like that? Why?

### **Missed sightings:**

- Tell me the story of an addiction screening that failed.
- Why do you think it failed?
- What could have been improved?

### **Successful referrals :**

- Now tell me the story of a screening that went well.
- What are the positive elements of this situation?
- What brought the patient to come to see the doctor the first time?

### **General medicine:**

- What do you think of screening in general medicine?
- What do you expect?
- What obstacles do you see?
- In your opinion, what should be done to improve how general practitioners identify addictions?
